# Supplementary material for: Inhibition of phase transition from δ-MnO2 to α-MnO2 by Mo-doping and the application of Mo-doped MnO2 in aqueous zinc-ion batteries
Source: Royal Society of Chemistry journal article supplement (doi:10.1039/d3cp04182d), 2023-01-01
Supplement: d3cp04182d1.pdf [file d3cp04182d1.pdf]

## Supplementary Information

# Inhibition of Mo-doping in Phase Transition from $\delta$ - $\text{MnO}_2$ to $\alpha$ - $\text{MnO}_2$ and their Application in Aqueous Zinc-ion Batteries

Yubin Liu\*,<sup>a</sup> Wenjie Chen,<sup>a</sup> Jingjing Su,<sup>a</sup> Xiaojing Zhao,<sup>a</sup> Xiaoyang Pan<sup>a</sup>

<sup>a</sup> College of Chemical Engineering and Materials, Quanzhou Normal University, Quanzhou 362000, China

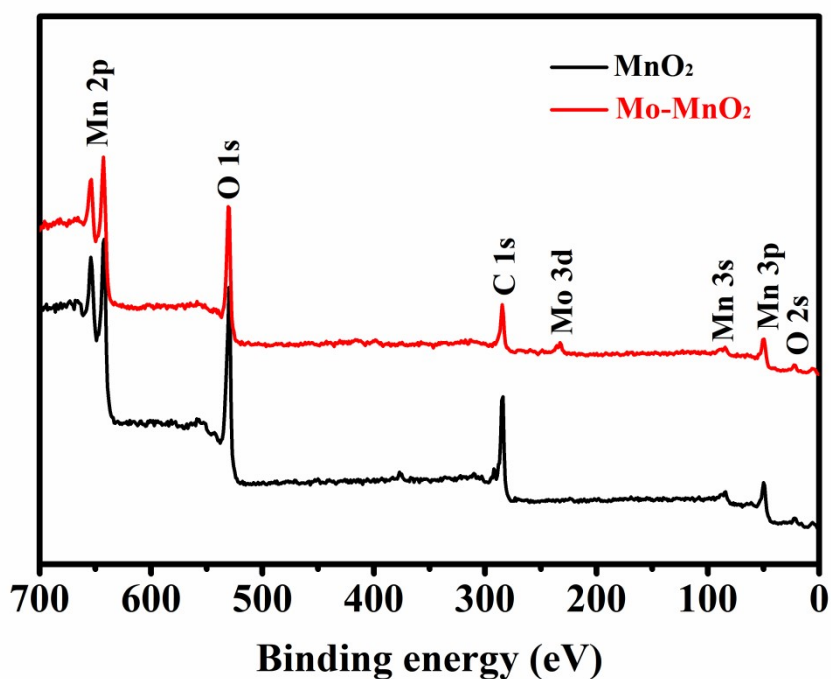

Fig. S1 XPS survey spectra of  $\text{MnO}_2$  and  $\text{Mo-MnO}_2$ .

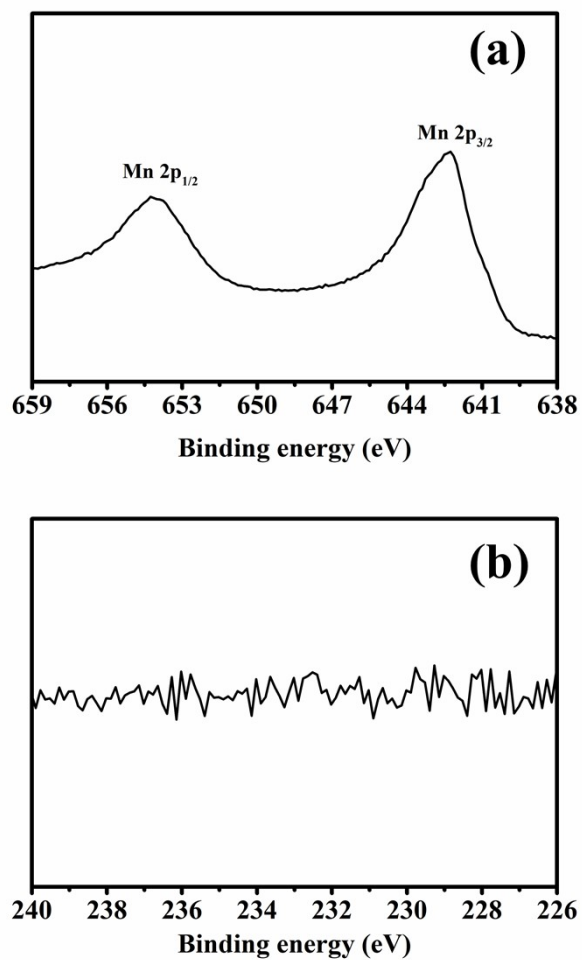

Fig. S2 High-resolution XPS spectra of (a) Mn 2p and (b) Mo 3d for MnO<sub>2</sub>.

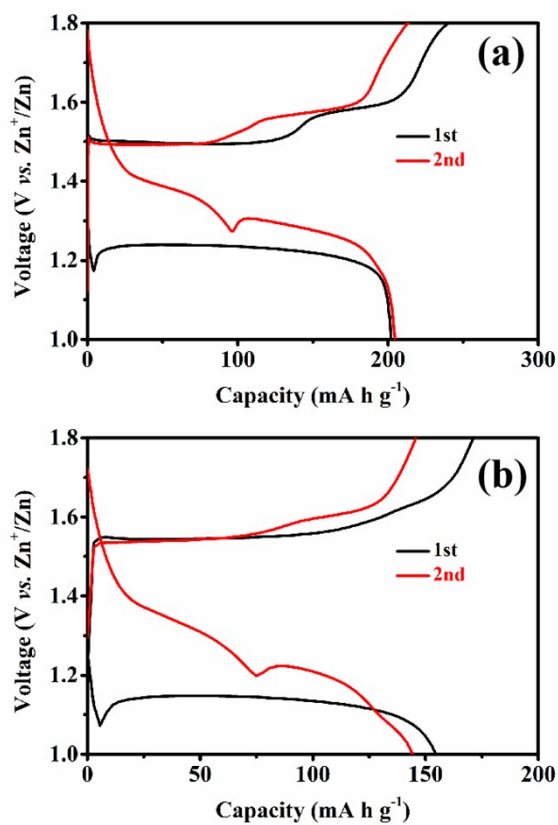

Fig. S3 Charge-discharge profiles of MnO<sub>2</sub> at different current densities of (a) 200 and (b) 2000 mA g<sup>-1</sup>.

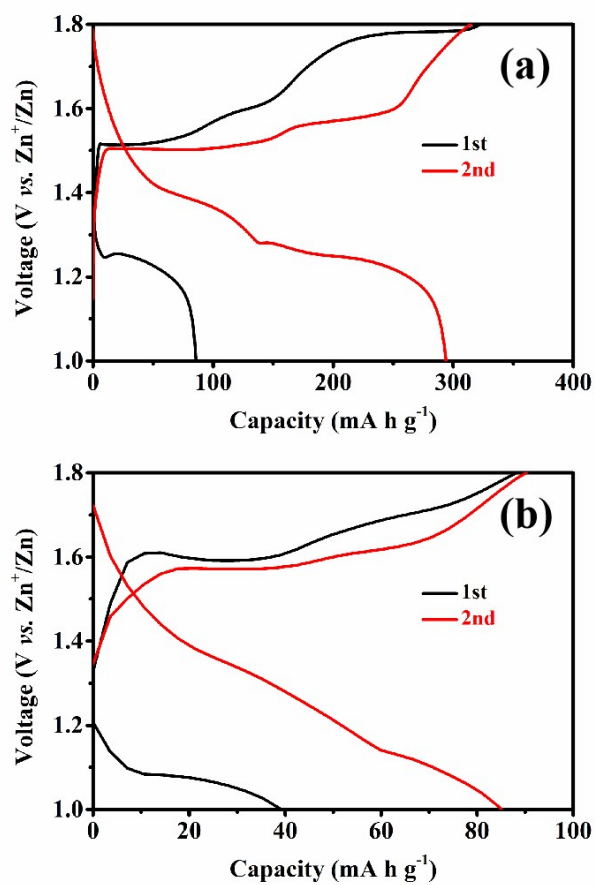

Fig. S4 Charge-discharge profiles of Mo-MnO<sub>2</sub> at different current densities of (a) 200 and (b) 2000 mA g<sup>-1</sup>.

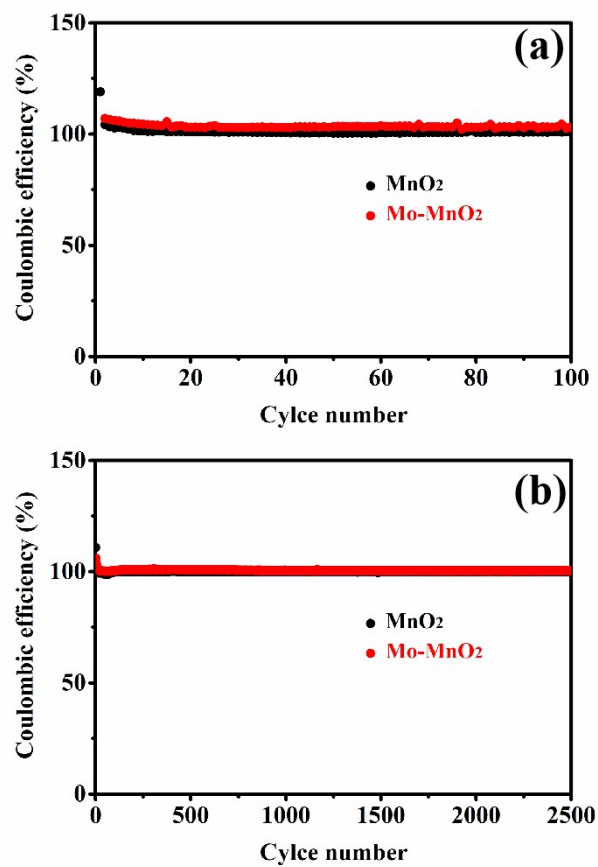

Fig. S5 Coulombic efficiency of MnO<sub>2</sub> and Mo-MnO<sub>2</sub> at different current densities of (a) 200 and (b) 2000 mA g<sup>-1</sup>.

Table 1 Summary of discharge capacity for various  $\delta$ -MnO<sub>2</sub> as cathodes for AZIBs.

| $\delta$ -MnO <sub>2</sub>                      | Discharge capacity (mA h g <sup>-1</sup> ) | Current density (mA g <sup>-1</sup> ) | Reference        |
|-------------------------------------------------|--------------------------------------------|---------------------------------------|------------------|
| Mo-MnO <sub>2</sub>                             | <b>353.5 (after 100 cycles)</b>            | <b>200</b>                            | <b>This work</b> |
|                                                 | <b>72.6 (after 2500 cycles)</b>            | <b>2000</b>                           |                  |
| Ultrathin $\delta$ -MnO <sub>2</sub> nanosheets | 133 (after 100 cycles)                     | 100                                   | S1               |
| Zn doped $\delta$ -MnO <sub>2</sub>             | 140 (after 100 cycles)                     | 200                                   | S2               |
|                                                 | about 75 (after 500 cycles)                | 500                                   |                  |
| Bi doped $\delta$ -MnO <sub>2</sub>             | 108 (after 5000 cycles)                    | 3000                                  | S3               |
| $\delta$ -MnO <sub>2</sub> nanodots             | 335 (after 100 cycles)                     | 50                                    | S4               |
| Mo-pre-intercalated MnO <sub>2</sub>            | 159 (after 1000 cycles)                    | 1000                                  | S5               |
| $\delta$ -MnO <sub>2</sub> nanoflower/graphite  | 113.4 (after 100 cycles)                   | 400                                   | S6               |
| K-pre-intercalated $\delta$ -MnO <sub>2</sub>   | about 250 (after 100 cycles)               | 100                                   | S7               |
|                                                 | 84 (after 1000 cycles)                     | 1000                                  |                  |

S1 C. Guo, H. Liu, J. Li, Z. Hou, J. Liang, J. Zhou, Y. Zhu and Y. Qian, *Electrochim. Acta*, 2019, 304, 370-377.

S2 W. Zhao, J. Fee, H. Khanna, S. March, N. Nisly, S. B. Rubio, C. Cui, Z. Li, S. L. Suib, *J. Mater. Chem. A*, 2022, 10, 6762-6771

S3 L. Guo, Y. Yang, Y. Zhang, J. Li, X. Fan, D. Li, *J. Solid State Electr.*, 2023, 27, 1443-1450.

S4 H. Tang, W. Chen, N. Li, Z. Hu, L. Xiao, Y. Xie, L. Xi, L. Ni, Y. Zhu, *Energy Storage Mater.*, 2022, 48, 335-343.

S5 Z. Wang, K. Han, Q. Wan, Y. Fang, X. Qu, P. Li, *ACS Appl. Mater. Interfaces*, 2023, 15, 859-869.

S6 S. Khamsanga, R. Pornprasertsuk, T. Yonezawa, A. A. Mohamad, S. Kheawhom, *Sci. Rep.*, 2019, 9, 8441.

S7 L. Liu, Y. Wu, L. Huang, K. Liu, B. Duployer, P. Rozier, P. Taberna, P. Simon, *Adv. Energy Mater.*, 2021, 11, 2101287.
